# Supplementary material
Source: PubMed Central journal article supplement (PMC1413905)
Supplement: pnas_0510998103_1.pdf [file pnas_0510998103_1.pdf]

**Supporting Appendix 1. Tables containing amino acid polymorphisms identified in *Saccharomyces cerevisiae* *MLH* and *MSH* genes**

| <i>MLH1</i> | Amino acid position |     |     |     |     |     |     |     |     |     |     |     |            |
|-------------|---------------------|-----|-----|-----|-----|-----|-----|-----|-----|-----|-----|-----|------------|
| Strains     | 240                 | 242 | 271 | 309 | 333 | 375 | 452 | 465 | 470 | 607 | 678 | 703 | <b>761</b> |
| S288c       | S                   | D   | L   | E   | E   | A   | S   | D   | P   | L   | D   | P   | <b>D</b>   |
| SK1         | R                   | D   | P   | E   | K   | A   | S   | D   | P   | L   | N   | L   | G          |
| W303        | S                   | D   | L   | E   | E   | A   | S   | D   | P   | L   | D   | P   | <b>D</b>   |
| YJM145      | S                   | D   | L   | E   | E   | A   | S   | D   | P   | L   | D   | P   | G          |
| YJM269      | S                   | D   | P   | E   | E   | A   | S   | N   | P   | L   | D   | P   | G          |
| YJM627      | S                   | D   | P   | E   | E   | A   | G   | D   | P   | F   | D   | P   | G          |
| M2-8        | S                   | D   | P   | E   | E   | A   | G   | D   | P   | F   | D   | P   | G          |
| M5-7        | S                   | D   | P   | E   | E   | A   | G   | D   | P   | F   | D   | P   | G          |
| M7-8        | S                   | D   | P   | E   | E   | A   | G   | D   | P   | F   | D   | P   | G          |
| M1-2 a*     | S                   | D   | P   | D   | E   | A   | G   | D   | P   | F   | D   | P   | G          |
| M1-2 b*     | S                   | D   | P   | E   | E   | A   | S   | N   | P   | Ls  | D   | P   | G          |
| YJM280      | S                   | D   | P   | E   | E   | A   | S   | N   | P   | L   | D   | P   | <b>D</b>   |
| YJM326      | S                   | E   | P   | E   | E   | A   | S   | D   | P   | L   | D   | P   | <b>D</b>   |
| YJM339      | S                   | E   | P   | E   | E   | T   | S   | D   | S   | L   | N   | L   | G          |
| YJM320      | S                   | D   | P   | E   | E   | A   | S   | D   | P   | L   | N   | L   | G          |

\*M1-2 is heterozygous for *MLH1*. The original diploid isolate was sporulated and tetrad dissected, and *MLH1* and *PMS1* were sequenced from three of four spore clones.

| <i>PMS1</i> | Amino acid position |     |     |     |     |     |     |       |     |     |     |     |     |     |            |
|-------------|---------------------|-----|-----|-----|-----|-----|-----|-------|-----|-----|-----|-----|-----|-----|------------|
| Strains     | 41                  | 112 | 309 | 384 | 392 | 400 | 401 | 416** | 458 | 475 | 513 | 564 | 619 | 768 | <b>818</b> |
| S288c       | N                   | S   | V   | F   | E   | T   | A   | T     | D   | D   | Y   | A   | N   | K   | R          |
| SK1         | S                   | T   | V   | V   | E   | S   | A   | TCEGT | D   | D   | F   | A   | N   | K   | <b>K</b>   |
| W303        | N                   | S   | V   | F   | E   | T   | A   | T     | D   | D   | Y   | A   | N   | K   | R          |
| YJM145      | N                   | S   | V   | F   | E   | T   | A   | T     | D   | D   | Y   | A   | N   | K   | R          |
| YJM269      | N                   | S   | V   | F   | E   | T   | A   | T     | D   | D   | Y   | A   | N   | K   | R          |
| YJM627      | N                   | S   | V   | F   | E   | T   | A   | T     | D   | D   | Y   | A   | N   | K   | R          |
| M2-8        | N                   | S   | V   | F   | E   | T   | A   | T     | D   | D   | Y   | A   | N   | K   | R          |
| M5-7        | N                   | S   | V   | F   | E   | T   | A   | T     | D   | D   | Y   | A   | N   | K   | R          |
| M7-8        | N                   | S   | V   | F   | E   | T   | A   | T     | D   | D   | Y   | A   | N   | K   | R          |
| M1-2 a      | N                   | S   | V   | F   | E   | T   | A   | T     | D   | D   | Y   | A   | N   | K   | R          |
| M1-2 b      | N                   | S   | V   | F   | E   | T   | A   | T     | Y   | D   | Y   | A   | N   | K   | R          |
| YJM280      | N                   | S   | F   | F   | E   | T   | A   | T     | D   | D   | Y   | A   | N   | K   | R          |
| YJM326      | N                   | S   | V   | V   | E   | S   | S   | TCEGT | D   | D   | Y   | A   | I   | K   | R          |
| YJM339      | N                   | S   | V   | V   | E   | S   | A   | TCEGT | D   | N   | Y   | A   | N   | K   | R          |
| YJM320      | N                   | S   | V   | V   | V   | S   | S   | TCEGT | D   | D   | Y   | V   | N   | R   | <b>K</b>   |

Amino acids in bold are implicated in mismatch repair (MMR) incompatibility as described in the text. Sequences have been deposited in the GenBank database (accession nos. DQ356633–DQ356646 for *MLH1* sequences and DQ356628–DQ356632 for *PMS1* sequences).

\*\*Some strains contain a 4-aa insertion after T416.

| <i>MSH2</i> | Amino acid position |     |     |     |
|-------------|---------------------|-----|-----|-----|
| Strains     | 277                 | 282 | 446 | 505 |
| S288c       | E                   | G   | N   | T   |
| SK1         | K                   | S   | K   | A   |

| <i>MSH3</i> | Amino acid position |    |     |
|-------------|---------------------|----|-----|
| Strains     | 25                  | 31 | 482 |
| S288c       | N                   | A  | L   |
| SK1         | T                   | V  | F   |

| <i>MSH6</i> | Amino acid position |    |     |     |     |     |     |     |
|-------------|---------------------|----|-----|-----|-----|-----|-----|-----|
| Strains     | 15                  | 79 | 221 | 224 | 225 | 237 | 254 | 885 |
| S288c       | E                   | V  | Y   | S   | H   | D   | N   | Q   |
| SK1         | K                   | A  | N   | L   | N   | N   | T   | L   |
