# Supplementary material
Source: PubMed Central journal article supplement (PMC1413905)
Supplement: pnas_0510998103_2.pdf [file pnas_0510998103_2.pdf]

## Supporting Appendix 2. List of strains used in this study

### S288c strains

EAY1091 *MATa, ura3-52, leu2Δ1, trp1Δ63, his3Δ200, lys2Δ202, cPMS1::HIS3, cmlh1Δ::KanMX4*

EAY1093 *MATa, ura3-52, leu2Δ1, trp1Δ63, his3Δ200, lys2Δ202, cPMS1::HIS3, cMLH1::KanMX4*

EAY1095 *MATa, ura3-52, leu2Δ1, trp1Δ63, his3Δ200, lys2Δ202, cPMS1::HIS3, cmlh1-29::KanMX4*

EAY1096 *MATa, ura3-52, leu2Δ1, trp1Δ63, his3Δ200, lys2Δ202, cPMS1::HIS3, cmlh1-56::KanMX4*

FY86 *MATα, ura3-52, leu2Δ1, his3Δ200*

EAY1365 *MATa, ura3-52, leu2Δ1, trp1Δ63, his3Δ200, lys2::insE-A<sub>14</sub>, mlh1Δ::KanMX4, pms1Δ::KanMX4*

EAY1369 *MATα, ura3-52, leu2Δ1, trp1Δ63, his3Δ200, lys2::insE-A<sub>14</sub>, cPMS1::HIS3*

EAY1370 *MATα, ura3-52, leu2Δ1, trp1Δ63, his3Δ200, lys2::insE-A<sub>14</sub>, cPMS1<sup>R818K</sup>::HIS3*

### SK1 strains

EAY1027 *MATa, trp1::hisG, leu2::hisG, ho::LYS2, ura3, lys2, CENXV::URA3, XV::LEU2*

EAY1080 *MATα, ura3, trp1, his3, ade2*

EAY1362 *MATα, ho::hisG, ura3, leu2::hisG, lys2::insE-A<sub>14</sub>, his4B, mlh1Δ::KanMX4, pms1Δ::KanMX4*

EAY1363 *MATa, ho::hisG, ura3, leu2::hisG, lys2::insE-A<sub>14</sub>, his4B, cMLH1::KanMX*

EAY1364 *MATa, ho::hisG, ura3, leu2::hisG, lys2::insE-A<sub>14</sub>, his4B, kMLH1::KanMX*

EAY1451 *MATα, ho::hisG, ura3, leu2::hisG, lys2::insE-A<sub>14</sub>, his4, mlh1Δ::KanMX4*

EAY1452 *MATa, ho::hisG, ura3, leu2::hisG, lys2::insE-A<sub>14</sub>, his4, mlh1Δ::KanMX4*

EAY1455 *MATα, ho::hisG, ura3, leu2::hisG, lys2::insE-A<sub>14</sub>, his4, cMLH1::KanMX*

EAY1456 *MATa, ho::hisG, ura3, leu2::hisG, lys2::insE-A<sub>14</sub>, his4, cMLH1::KanMX*

EAY1459 *MATα, ho::hisG, ura3, leu2::hisG, lys2::insE-A<sub>14</sub>, his4, kMLH1::KanMX*

EAY1460 *MATa, ho::hisG, ura3, leu2::hisG, lys2::insE-A<sub>14</sub>, his4, kMLH1::KanMX*
